# Supplementary material for: Mechanistic studies on lithium intercalation in a lithium-rich layered material using Li2RuO3epitaxial film electrodes and in situ surface X-ray analysis
Source: Royal Society of Chemistry journal article supplement (doi:10.1039/c4ta02795g), 2014-09-03
Supplement: c4ta02795g1.pdf [file c4ta02795g1.pdf]

# Electronic Supplementary Information

**Mechanistic studies on lithium intercalation in a lithium-excess layered material using**

**$\text{Li}_2\text{RuO}_3$  epitaxial film electrodes and *in situ* surface X-ray analysis**

Sou Taminato,<sup>a</sup> Masaaki Hirayama,<sup>\*a</sup> Kota Suzuki,<sup>a</sup> KyungSu Kim,<sup>a</sup> Kazuhisa Tamura,<sup>b</sup>

Jun'ichiro Mizuki<sup>b</sup> and Ryoji Kanno<sup>a</sup>

<sup>a</sup> Department of Electronic Chemistry, Tokyo Institute of Technology, 4259 Nagatsuta-cho,

Midoriku-ku, Yokohama 226-8502, Japan

<sup>b</sup> Japan Atomic Energy Agency, Synchrotron Radiation Research Center, Kansai Research

Establishment, 1-1-1 Kouto, Sayo-cho, Sayo-gun, Hyogo 679-5148, Japan

\*Phone: +81459245503

\*E-mail: hirayama@echem.titech.ac.jp

## X-ray reflectivity analysis

Figure S1 presents typical X-ray reflectivity (XRR) spectra of the (010) and (001) films, acquired in air using a thin-film X-ray diffractometer (ATX-G, CuK $\alpha_1$ ). The spectra are plotted as a function of the scattering vector,  $Q_z = 4\pi(\sin\theta)/\lambda$ , where  $\lambda$  is the wavelength of the X-rays (1.541 Å) and  $\theta$  is the incident angle. The thickness of each film was estimated by applying the Fourier transform technique to these X-ray reflectivity curves. The thickness, density and roughness of the films were refined using the Parratt32 data analysis program, with reflectivity values calculated using Parratt's method.<sup>1</sup> A four-layer model composed of the SrTiO<sub>3</sub> substrate, an interfacial layer between the SrTiO<sub>3</sub> and the Li<sub>2</sub>RuO<sub>3</sub>, the Li<sub>2</sub>RuO<sub>3</sub> film and a surface layer provided the best fits to the reflectivity curves and the fitting parameters are summarized in Table S1. The surface layer was found to have a density of approximately 2 g cm<sup>-3</sup>, significantly lower than that of the Li<sub>2</sub>RuO<sub>3</sub> layer (ca. 5.1 g cm<sup>-3</sup>). Low density surface impurity phases such as Li<sub>2</sub>CO<sub>3</sub> ( $\rho = 2.1$  g cm<sup>-3</sup>) and LiOH ( $\rho = 1.5$  g cm<sup>-3</sup>) are often formed on lithium intercalation materials due to surface reactions with the moisture and carbon dioxide in the surrounding air.<sup>2-5</sup> The low density of the surface layer therefore suggests the formation of one or more of these impurity phases on the bare Li<sub>2</sub>RuO<sub>3</sub> electrode. No significant differences in density and roughness were observed between the (010) and (001)

films. In addition, the results of analyses of films with different thicknesses indicated that there was no significant correlation between the film thickness and the density or roughness.

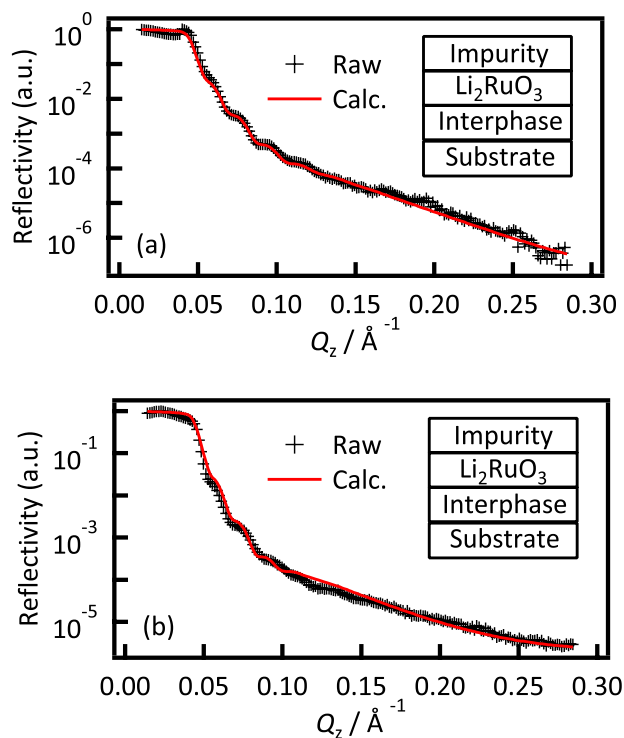

**Figure S1.** XRR spectra and simulated curves for (a) (010) and (b) (001) films. The insets show simulation models.

**Table S1.** XRR analysis results for (010) and (001) films.

|                                                 | Thickness, $t$ (nm) | Density, $d$ (g cm <sup>-3</sup> ) | Roughness, $r$ (nm) |
|-------------------------------------------------|---------------------|------------------------------------|---------------------|
| (a) Li <sub>2</sub> RuO <sub>3</sub> (010) film |                     |                                    |                     |
| Surface layer                                   | 2.3                 | 2.02                               | 0.6                 |
| Li <sub>2</sub> RuO <sub>3</sub>                | 23.7                | 5.19                               | 2.0                 |
| Interphase                                      | 4.3                 | 4.79                               | 1.8                 |
| SrTiO <sub>3</sub> substrate                    | -                   | 5.12                               | 2.2                 |
| (b) Li <sub>2</sub> RuO <sub>3</sub> (001) film |                     |                                    |                     |
| Surface layer                                   | 3.0                 | 1.92                               | 0.6                 |
| Li <sub>2</sub> RuO <sub>3</sub>                | 24.3                | 5.10                               | 2.1                 |
| Interphase                                      | 5.2                 | 4.79                               | 2.1                 |
| SrTiO <sub>3</sub> substrate                    | -                   | 5.12                               | 2.2                 |

## Thickness dependence of cell parameters

Figure S2 shows the variations in the  $d$  values of the 004 and 060 peaks of the (010) and (001) films with film thickness. The values of the 004 and 060 peaks are distributed within the ranges of 2.38–2.44 Å and 1.46–1.48 Å, respectively. These results also support our finding that there is no significant effect of film thickness on the  $\text{Li}_2\text{RuO}_3$  thin films. Hence, the (010) and (001) films provide a two-dimensional reaction field suitable for modeling the lattice plane dependence of electrode reactions.

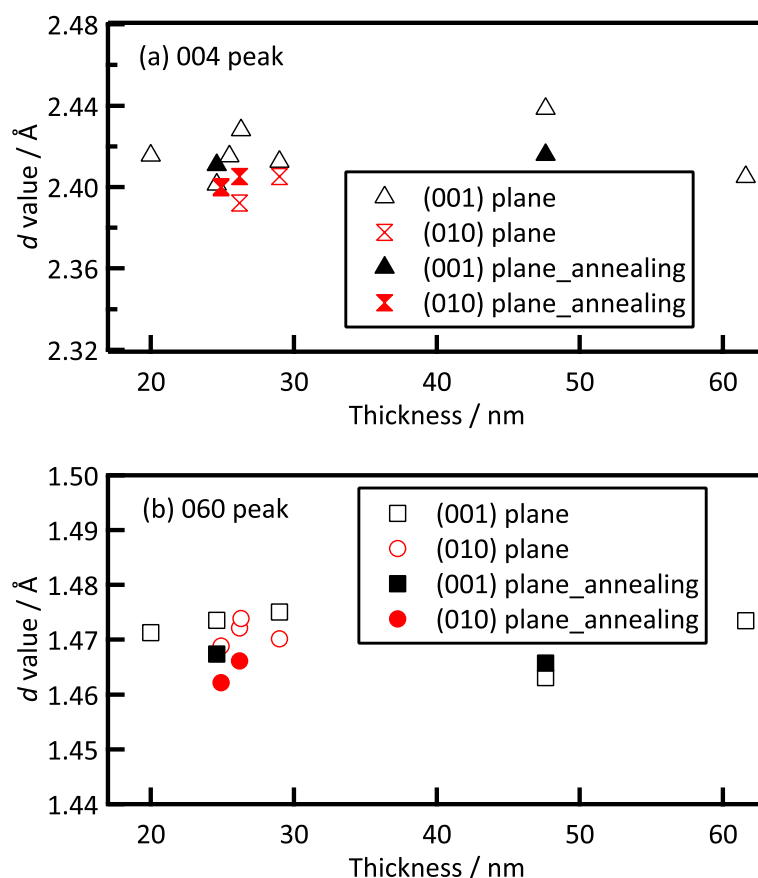

**Figure S2.** Thickness dependence of  $d$  values of (a) 004 and (b) 060 peaks of  $\text{Li}_2\text{RuO}_3$  thin films. Filled symbols in each figure indicate data obtained for films after annealing.

### **Bulk structure change of the (010) film along in-plane direction**

Figure S3 shows the XRD pattern of the in-plane 202 diffraction peak for a 61.6 nm-thick  $\text{Li}_2\text{RuO}_3(010)$  film after electrochemical cycling. The charge/discharge test was performed using a coin-type cell, and then the cell was disassembled. The film was washed in ethanol solution, and the in-plane XRD pattern was collected in air using an incident angle of  $0.36^\circ$  which is higher than the critical angle of  $\text{Li}_2\text{RuO}_3$ . The penetration depth of X-ray ( $\text{Cu-K}\alpha$ ) was calculated to be 57 nm at the incident angle, which indicates that the in-plane XRD pattern corresponds to the structural change throughout the film. No additional diffraction peak was observed except for the 202 peak of  $\text{Li}_2\text{RuO}_3$ . This result confirms that no irreversible phase transition occurred along the in-plane direction at the  $\text{Li}_2\text{RuO}_3(010)$  bulk during the electrochemical reactions. This supports that the irreversible phase change of the (010) film detected by the *in situ* in-plane XRD measurements occurred at the surface region (Figs. 5 and 6), because the XRD patterns were collected using low incident angles of X-rays below the critical angle of  $\text{Li}_2\text{RuO}_3$ .

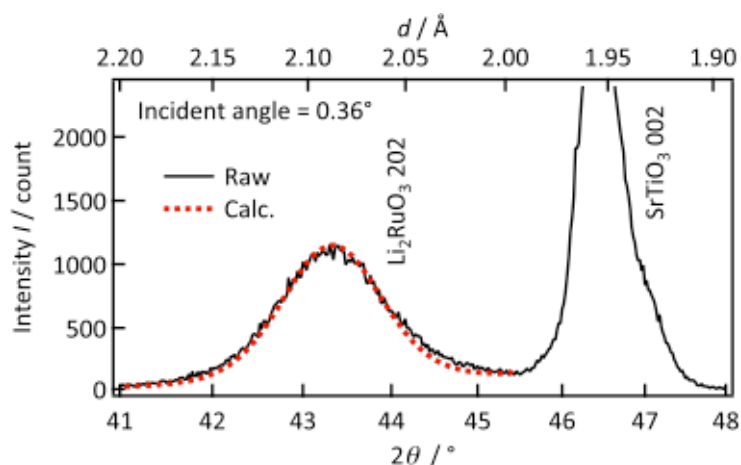

**Figure S3** XRD pattern of the in-plane 202 diffraction peak for a 61.6 nm-thick  $\text{Li}_2\text{RuO}_3(010)$

film after electrochemical cycling.

### Lithium diffusion pathways in $\text{Li}_2\text{RuO}_3$

Figure S4 shows the possible diffusion pathways of lithium in the  $ab$  plane and along the  $c$  axis in  $\text{Li}_2\text{RuO}_3$  with the  $C2/c$  space group. The (010) film has two-dimensional  $[\text{LiO}_6]$  and  $[(\text{Li,Ru})\text{O}_6]$  layers perpendicular to the electrolyte, which has an interlayer Li diffusion pathway between the octahedral  $4e$  sites through the interstitial tetragonal  $8f$  site in the  $ab$  plane. In contrast, the (001) film, in which these layers are parallel to the electrolyte, has the Li diffusion pathway through the  $[\text{LiO}_6]$  and  $[(\text{Li,Ru})\text{O}_6]$  slabs along the  $c$  axis. The lithium ions diffuse from the octahedral  $4e$  sites in the  $[\text{LiO}_6]$  layer to the octahedral  $4d$  sites in the  $[(\text{Li,Ru})\text{O}_6]$  layer through the interstitial tetragonal  $8f$  site. The interstitial  $\text{LiO}_4$  tetrahedra and the  $\text{LiO}_6$  octahedra share their faces in the  $ab$  plane and along the  $c$  direction. The sizes of the

bottlenecks associated with lithium diffusion in the  $ab$  plane and along the  $c$  axis are  $4.03 \text{ \AA}^2$  and  $3.68 \text{ \AA}^2$ , respectively, based on calculations using the crystal structure of polycrystalline  $\text{Li}_2\text{RuO}_3$ .<sup>6</sup> The larger opening available for lithium diffusion along the  $ab$  plane as compared to along the  $c$  axis therefore leads us to expect faster lithium diffusion in the  $ab$  plane. The anisotropic activation energies of lithium diffusion in the lithium-excess layered material  $\text{Li}_2\text{MnO}_3$ , with a similar crystal structure to  $\text{Li}_2\text{RuO}_3$ , have been determined by first-principles calculations. The results of these calculations confirm the bottleneck evidence, since the calculated activation energy of lithium diffusion along the  $ab$  plane ( $0.61 \text{ eV}$ ) is lower than that along the  $c$  axis ( $0.73 \text{ eV}$ ).<sup>7</sup>

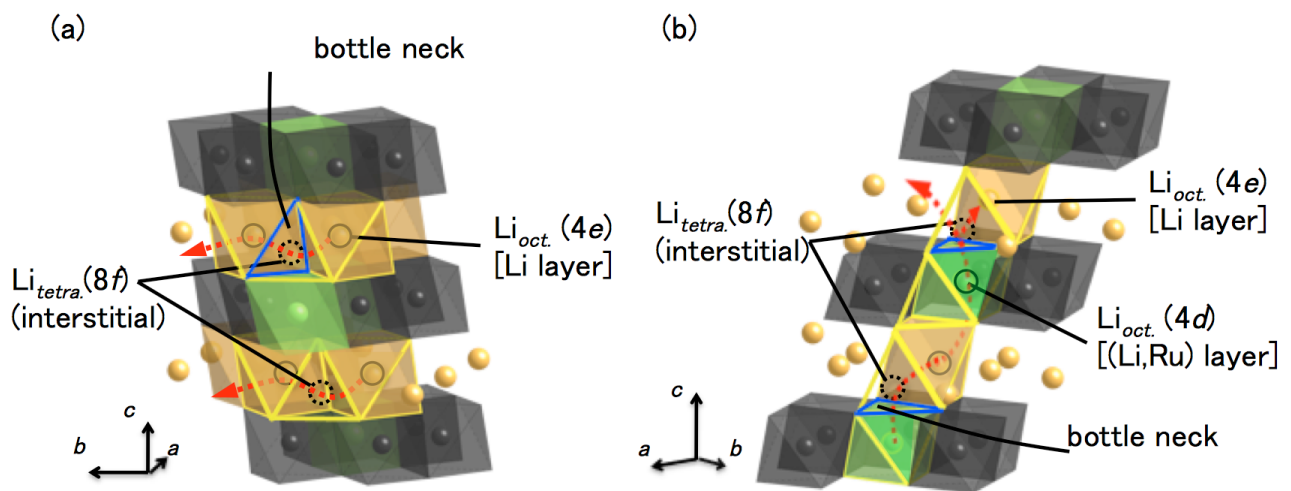

**Figure S4.** Possible lithium diffusion pathways in  $\text{Li}_2\text{RuO}_3$  along the (a) (010) and (b) (001) directions.

## References

- 1 L. G. Parratt, *Physical Review*, 1954, **95**, 359-369.
- 2 M. Hirayama, N. Sonoyama, M. Ito, M. Minoura, D. Mori, A. Yamada, K. Tamura, J. Mizuki and R. Kanno, *Journal of the Electrochemical Society*, 2007, **154**, A1065-A1072.
- 3 M. Hirayama, N. Sonoyama, T. Abe, M. Minoura, M. Ito, D. Mori, A. Yamada, R. Kanno, T. Terashima, M. Takano, K. Tamura and J. Mizuki, *Journal of Power Sources*, 2007, **168**, 493-500.
- 4 M. Hirayama, K. Sakamoto, T. Hiraide, D. Mori, A. Yamada, R. Kanno, N. Sonoyama, K. Tamura and J. Mizuki, *Electrochimica Acta*, 2007, **53**, 871-881.
- 5 M. Hirayama, M. Yonemura, K. Suzuki, N. Torikai, H. Smith, E. Watkins and J. Majewski and R. Kanno, *Electrochemistry*, 2010, **78**, 413-415.
- 6 H. Kobayashi, R. Kanno, Y. Kawamoto, M. Tabuchi, O. Nakamura and M. Takano, *Solid State Ionics*, 1995, **82**, 25-31.
- 7 R. Xiao, H. Li and L. Chen, *Chemistry of Materials*, 2012, **24**, 4242-4251.
